# Supplementary material for: The Antipsychotic Agent Sertindole Exhibited Antiproliferative Activities by Inhibiting the STAT3 Signaling Pathway in Human Gastric Cancer Cells
Source: PubMed Central journal article supplement (PMC6959018; doi:10.7150/jca.34847), 2020-01-01
Supplement: jcav11p0849s1.pdf [file jcav11p0849s1.pdf]

**Supplementary figure 1.** Sertindole inhibited normal hepatic cell lines cell proliferation in vitro.

The growth inhibitory effect of sertindole was measured using the CCK-8 assay. Two normal hepatic cell lines LO2 and WRL68 cells were treated with varying concentrations of sertindole (from 0 to 20  $\mu\text{M}$  for 24 h). The experiments were performed in triplicate, and the data are presented as the mean  $\pm$  standard deviation (SD) of three separate experiments.

**Supplementary figure 2.** Body weight of nude mice was measured on the indicated days.

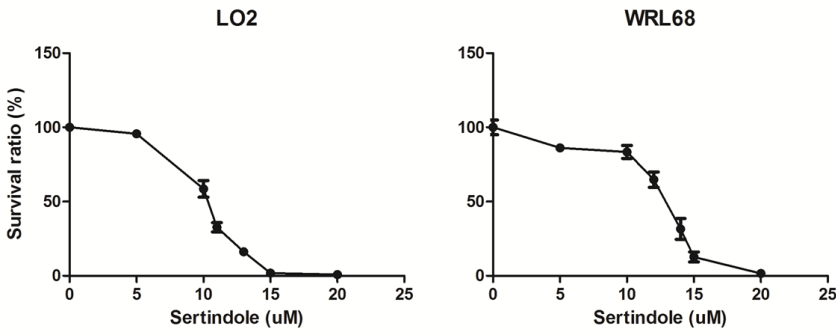

Supplementary figure 1

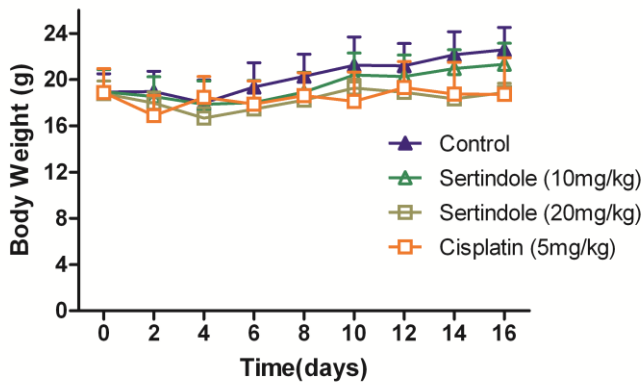

Supplementary figure 2
